# Supplementary material for: Weak hydrogen bonding competition between O–H⋯π and O–H⋯Cl
Source: Royal Society of Chemistry journal article supplement (doi:10.1039/c7ra00901a), 2017-01-01
Supplement: c7ra00901a1.pdf [file c7ra00901a1.pdf]

Electronic supplementary information (ESI)

## **Weak Hydrogen Bonding Competition between O–H··· $\pi$ and O–H···Cl**

Hailiang Zhao, Shanshan Tang, Qun Zhang and Lin Du\*

Environment Research Institute, Shandong University, Shanda South Road 27, 250100  
Shandong, China

E-mail: lindu@sdu.edu.cn

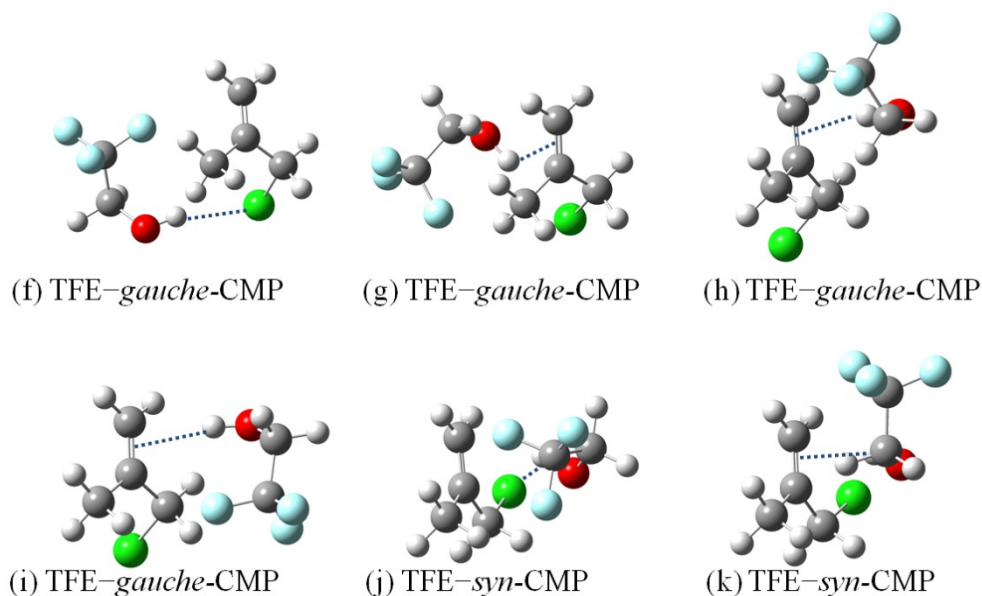

Fig. S1. The high-lying structures of the TFE-CMP complexes obtained at the B3LYP-D3/aug-cc-pVTZ level. The dashed lines denote the O-H $\cdots$  $\pi$  and O-H $\cdots$ Cl hydrogen bonds.

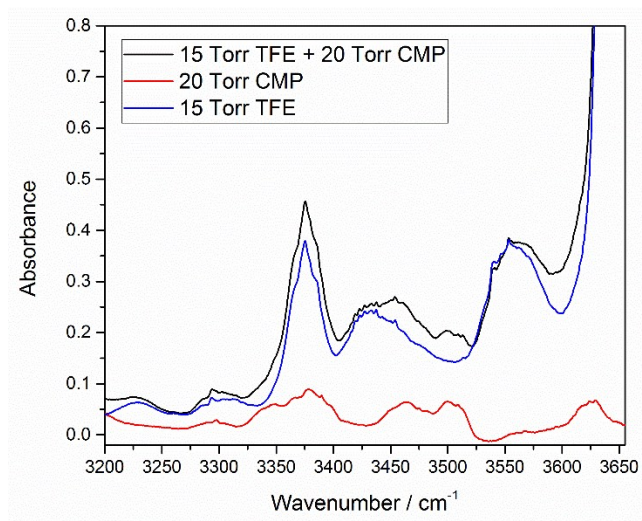

Fig. S2. Spectra of TFE, CMP, and their mixture in the 3200-3650  $\text{cm}^{-1}$  region. A 6 m path length cell was used.

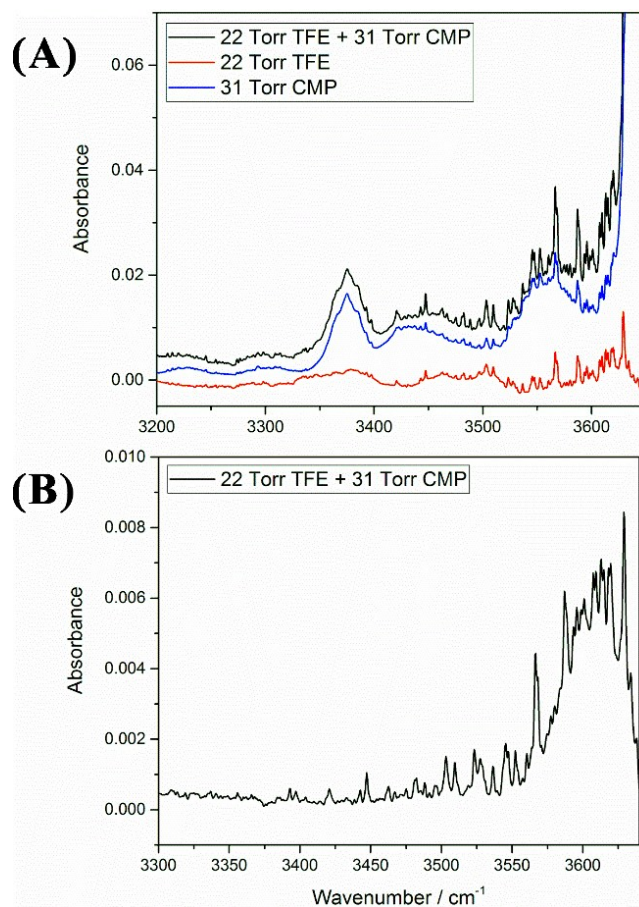

Fig. S3. (A) Spectra of TFE, CMP, and their mixture in the 3200-3650 cm<sup>-1</sup> region. A 20 cm path length cell was used. (B) Spectra of the TFE-CMP complex in the  $\nu_{OH}$  band region.

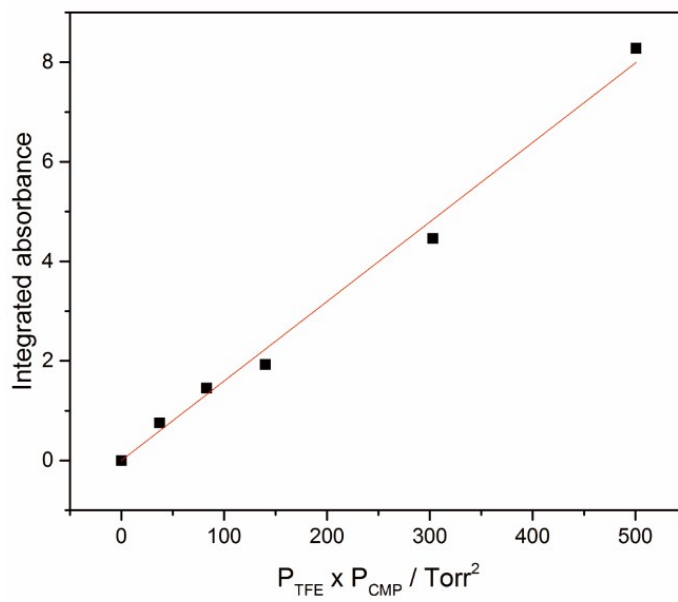

Fig. S4. The integrated absorbance of the OH-stretching band in the TFE–CMP complex as a function of the product of the TFE and CMP pressures. The integration region for TFE–CMP is 3525-3632  $\text{cm}^{-1}$ .

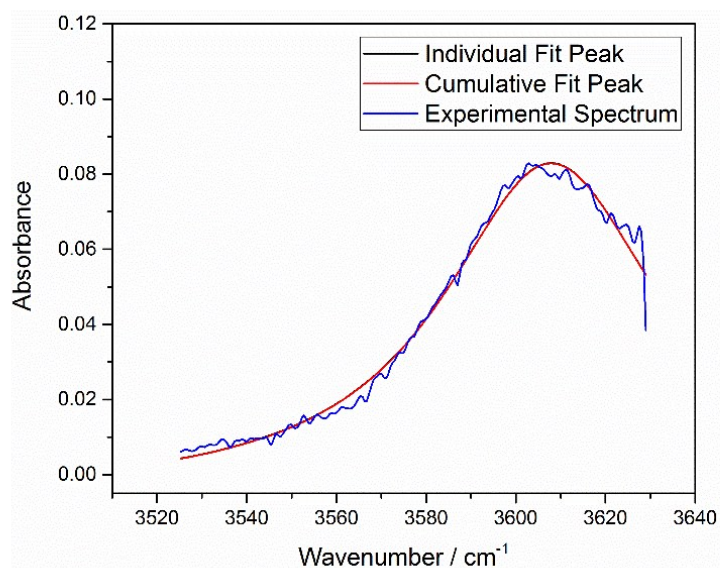

Fig. S5. The deconvolution fitting of the OH-stretching fundamental transition band of TFE–CMP.

**Table S1.** Selected geometric parameters of the most stable TFE–CMP structures at the MP2/aug-cc-pVTZ level (angles in degrees; lengths/distances in Å)

| structures                  | O–H··· $\pi$ /Cl                  |                            |                     | C=C                                |
|-----------------------------|-----------------------------------|----------------------------|---------------------|------------------------------------|
|                             | $\Delta r_{\text{OH}}^{\text{a}}$ | $r_{\text{HB}}^{\text{b}}$ | $\theta^{\text{c}}$ | $\Delta r_{\text{C=C}}^{\text{d}}$ |
| TFE– <i>gauche</i> -CMP (a) | 0.0051                            | --                         | --                  | 0.0028                             |
| TFE– <i>gauche</i> -CMP (b) | 0.0066                            | --                         | --                  | 0.0035                             |
| TFE– <i>gauche</i> -CMP (c) | 0.0061                            | 2.2952                     | 152.8               | 0.0004                             |
| TFE– <i>syn</i> -CMP (d)    | 0.0055                            | --                         | --                  | 0.0039                             |
| TFE– <i>syn</i> -CMP (e)    | 0.0046                            | 2.3871                     | 174.1               | 0.0014                             |

<sup>a</sup>  $\Delta r_{\text{OH}} = r_{\text{complex}} - r_{\text{monomer}}$ , is the change in the OH bond length upon complexation. <sup>b</sup> Intermolecular hydrogen bond distance. <sup>c</sup> Intermolecular hydrogen bond angle. <sup>d</sup>  $\Delta r_{\text{C=C}} = r_{\text{complex}} - r_{\text{monomer}}$ , is the change in the C=C bond length upon complexation.

**Table S2.** Comparison of the calculated BE (not corrected) and BSSE of the most stable TFE–CMP structures with B3LYP-D3 and MP2 methods (kJ mol<sup>-1</sup>)

| structures                  | B3LYP-D3/aug-cc-pVTZ |      | MP2/aug-cc-pVTZ |      |
|-----------------------------|----------------------|------|-----------------|------|
|                             | BE                   | BSSE | BE              | BSSE |
| TFE– <i>gauche</i> -CMP (a) | -26.1                | 0.9  | -29.5           | 6.4  |
| TFE– <i>gauche</i> -CMP (b) | -23.7                | 1.2  | -28.3           | 7.0  |
| TFE– <i>gauche</i> -CMP (c) | -25.7                | 1.0  | -28.3           | 6.3  |
| TFE– <i>syn</i> -CMP (d)    | -30.4                | 1.1  | -33.4           | 7.3  |
| TFE– <i>syn</i> -CMP (e)    | -28.7                | 1.1  | -32.3           | 7.4  |
